# Supplementary material for: Racial-Ethnic Differences in Patterns of Discontinuous Medication Treatment Among Medicaid-Insured Youths With ADHD
Source: Atypon-hosted journal article supplement (doi:10.1176/appi.ps.201600469), 2017-12-01
Supplement: appi.ps.201600469.ds001.pdf [file appi.ps.201600469.ds001.pdf]

**Appendix Table 1:** HEDIS List of Prescription Medications for ADHD

| Drug Class                     | Prescription                  |
|--------------------------------|-------------------------------|
| CNS stimulants                 | Amphetamine-dextroamphetamine |
|                                | Dexmethylphenidate            |
|                                | Dextroamphetamine             |
|                                | Methylphenidate               |
|                                | Lisdexamfetamine              |
|                                | Methamphetamine               |
| Alpha-2 receptor agonists      | Clonidine                     |
|                                | Guanfacine                    |
| Miscellaneous ADHD medications | Atomoxetine                   |

*Notes:* HEDIS: Healthcare Effectiveness Data and Information Set.

ADHD: attention-deficit/hyperactivity disorder.

CNS: central nervous system.

**Appendix Table 2: ICD9-CM Codes of Mental Health and Physical Health Comorbidities**

| <b>Condition</b>                                          | <b>ICD9-CM code</b>                                            |
|-----------------------------------------------------------|----------------------------------------------------------------|
| Mental health comorbidity                                 |                                                                |
| Depressive disorder                                       | 296.2, 296.3, 300.4, 311                                       |
| Conduct disorder / oppositional defiant disorder (CD/ODD) | 312.81, 312.82, 312.89, 313.81, 312.9                          |
| Anxiety disorder                                          | 300.0-300.3, 300.5-300.9                                       |
| Bipolar disorder                                          | 296.0-296.1, 296.4-296.9                                       |
| Schizophrenia / other psychotic disorder                  | 295, 297.0-297.3, 297.8-298.4, 298.8-298.9                     |
| Other mental health disorder                              | 291-294, 299, 301, 306-310, 312 excluding CD/ODD, 313, 315-316 |
|                                                           |                                                                |
| Physical health comorbidity                               |                                                                |
| Asthma                                                    | 493                                                            |
| Other chronic medical condition <sup>§</sup>              |                                                                |
| Cerebral palsy                                            | 343                                                            |
| Cystic fibrosis                                           | 277                                                            |
| Diabetes                                                  | 250, 251                                                       |
| Spina bifida                                              | 741                                                            |
| Seizure disorder                                          | 345                                                            |
| Congenital heart disease                                  | 745-747.49                                                     |
| Sickle cell disease                                       | 282.6                                                          |
| Malignant neoplasms                                       | 140-208                                                        |

*Notes:* <sup>§</sup> “Other chronic conditions” included cerebral palsy, cystic fibrosis, diabetes, spina bifida, seizure disorder, congenital heart disease, sickle cell disease, and malignant neoplasms; these eight conditions were selected due to their link to high healthcare utilization among Medicaid-insured children, and were grouped into one dichotomous indicator due to their small sample sizes.

**Appendix Table 3: Current Procedural Terminology (CPT) Codes for Psychotherapy**

| CPT Codes | Description                                                                                                                                                                                                                                     |
|-----------|-------------------------------------------------------------------------------------------------------------------------------------------------------------------------------------------------------------------------------------------------|
| 90804     | Individual psychotherapy, insight oriented, behavior modifying and/or supportive, in an office or outpatient facility, approximately 20 to 30 minutes face-to-face with the patient;                                                            |
| 90805     | Individual psychotherapy, insight oriented, behavior modifying and/or supportive, in an office or outpatient facility, approximately 20 to 30 minutes face-to-face with the patient; with medical evaluation and management services            |
| 90806     | Individual psychotherapy, insight oriented, behavior modifying and/or supportive, in an office or outpatient facility, approximately 45 to 50 minutes face-to-face with the patient;                                                            |
| 90807     | Individual psychotherapy, insight oriented, behavior modifying and/or supportive, in an office or outpatient facility, approximately 45 to 50 minutes face-to-face with the patient; with medical evaluation and management services            |
| 90808     | Individual psychotherapy, insight oriented, behavior modifying and/or supportive, in an office or outpatient facility, approximately 75 to 80 minutes face-to-face with the patient;                                                            |
| 90809     | Individual psychotherapy, insight oriented, behavior modifying and/or supportive, in an office or outpatient facility, approximately 75 to 80 minutes face-to-face with the patient; with medical evaluation and management services            |
| 90810     | Individual psychotherapy, interactive, using play equipment, physical devices, language interpreter, or other mechanisms of non-verbal communication, in an office or outpatient facility, approximately 20 to 30 minutes face-to-face with the |
| 90811     | Individual psychotherapy, interactive, using play equipment, physical devices, language interpreter, or other mechanisms of non-verbal communication, in an office or outpatient facility, approximately 20 to 30 minutes face-to-face with the |
| 90812     | Individual psychotherapy, interactive, using play equipment, physical devices, language interpreter, or other mechanisms of non-verbal communication, in an office or outpatient facility, approximately 45 to 50 minutes face-to-face with the |
| 90813     | Individual psychotherapy, interactive, using play equipment, physical devices, language interpreter, or other mechanisms of non-verbal communication, in an office or outpatient facility, approximately 45 to 50 minutes face-to-face with the |
| 90814     | Individual psychotherapy, interactive, using play equipment, physical devices, language interpreter, or other mechanisms of non-verbal communication, in an office or outpatient facility, approximately 75 to 80 minutes face-to-face with the |
| 90815     | Individual psychotherapy, interactive, using play equipment, physical devices, language interpreter, or other mechanisms of non-verbal communication, in an office or outpatient facility, approximately 75 to 80 minutes face-to-face with the |
| 90816     | Individual psychotherapy, insight oriented, behavior modifying and/or supportive, in an inpatient hospital, partial hospital or residential care setting, approximately 20 to 30 minutes face-to-face with the patient;                         |
| 90817     | Individual psychotherapy, insight oriented, behavior modifying and/or supportive, in an inpatient hospital, partial hospital or residential care setting, approximately 20 to 30 minutes face-to-face with the patient; with medical evaluation |
| 90818     | Individual psychotherapy, insight oriented, behavior modifying and/or supportive, in an inpatient hospital, partial hospital or residential care setting, approximately 45 to 50 minutes face-to-face with the patient;                         |

**Appendix Table 3 (Continued):** Current Procedural Terminology (CPT) Codes for Psychotherapy

| CPT Codes | Description                                                                                                                                                                                                                                     |
|-----------|-------------------------------------------------------------------------------------------------------------------------------------------------------------------------------------------------------------------------------------------------|
| 90819     | Individual psychotherapy, insight oriented, behavior modifying and/or supportive, in an inpatient hospital, partial hospital or residential care setting, approximately 45 to 50 minutes face-to-face with the patient; with medical evaluation |
| 90821     | Individual psychotherapy, insight oriented, behavior modifying and/or supportive, in an inpatient hospital, partial hospital or residential care setting, approximately 75 to 80 minutes face-to-face with the patient;                         |
| 90822     | Individual psychotherapy, insight oriented, behavior modifying and/or supportive, in an inpatient hospital, partial hospital or residential care setting, approximately 75 to 80 minutes face-to-face with the patient; with medical evaluation |
| 90823     | Individual psychotherapy, interactive, using play equipment, physical devices, language interpreter, or other mechanisms of non-verbal communication, in an inpatient hospital, partial hospital or residential care setting, approximately 20  |
| 90824     | Individual psychotherapy, interactive, using play equipment, physical devices, language interpreter, or other mechanisms of non-verbal communication, in an inpatient hospital, partial hospital or residential care setting, approximately 20  |
| 90826     | Individual psychotherapy, interactive, using play equipment, physical devices, language interpreter, or other mechanisms of non-verbal communication, in an inpatient hospital, partial hospital or residential care setting, approximately 45  |
| 90827     | Individual psychotherapy, interactive, using play equipment, physical devices, language interpreter, or other mechanisms of non-verbal communication, in an inpatient hospital, partial hospital or residential care setting, approximately 45  |
| 90828     | Individual psychotherapy, interactive, using play equipment, physical devices, language interpreter, or other mechanisms of non-verbal communication, in an inpatient hospital, partial hospital or residential care setting, approximately 75  |
| 90829     | Individual psychotherapy, interactive, using play equipment, physical devices, language interpreter, or other mechanisms of non-verbal communication, in an inpatient hospital, partial hospital or residential care setting, approximately 75  |
| 90846     | Family psychotherapy (without the patient present)                                                                                                                                                                                              |
| 90847     | Family psychotherapy (conjoint psychotherapy) (with patient present)                                                                                                                                                                            |
| 90849     | Multiple-family group psychotherapy                                                                                                                                                                                                             |
| 90853     | Group psychotherapy (other than of a multiple-family group)                                                                                                                                                                                     |
| 90857     | Interactive group psychotherapy                                                                                                                                                                                                                 |

**Appendix Table 4:** A New Specification of Multinomial Logistic Model of Racial/Ethnic Differences in Patterns of Medication Treatment among Medicaid-insured Children that Initiated ADHD Medication, Excluding Measures of County-Level Characteristics, Use of New Medication, and Medication Switching

|                                                     | Continuous Medication <sup>‡</sup> |     | Early Termination <sup>‡</sup> |     | One Gap with Re-initiation <sup>‡</sup> |     | Two Gaps <sup>‡</sup> |     | ≥ 3 Gaps <sup>‡</sup> |     |
|-----------------------------------------------------|------------------------------------|-----|--------------------------------|-----|-----------------------------------------|-----|-----------------------|-----|-----------------------|-----|
|                                                     | ME (%) <sup>¶</sup>                | SE  | ME (%) <sup>¶</sup>            | SE  | ME (%) <sup>¶</sup>                     | SE  | ME (%) <sup>¶</sup>   | SE  | ME (%) <sup>¶</sup>   | SE  |
| Race/ethnicity (reference: Non-Hispanic White)      |                                    |     |                                |     |                                         |     |                       |     |                       |     |
| Non-Hispanic Black                                  | -23.4***                           | .6  | 4.2***                         | .3  | .3                                      | .2  | 7.2***                | .2  | 11.8***               | .3  |
| Hispanic                                            | -18.9***                           | 1.0 | 4.2***                         | .6  | .1                                      | .2  | 5.8***                | .5  | 8.9***                | .4  |
| Non-Hispanic Other                                  | -16.0***                           | 3.0 | 4.8**                          | 1.6 | 1.2                                     | .7  | 5.4***                | 1.1 | 4.6***                | 1.4 |
| Unknown                                             | -11.2***                           | 1.0 | 1.2*                           | .5  | .2                                      | .3  | 3.3***                | .5  | 6.5***                | .7  |
| Demographics                                        |                                    |     |                                |     |                                         |     |                       |     |                       |     |
| Age                                                 | -3.5***                            | .1  | 1.0***                         | .05 | -.03                                    | .04 | 1.2***                | .1  | 1.4***                | .1  |
| Female (reference: Male)                            | -.9**                              | .3  | 1.1***                         | .2  | .01                                     | .1  | .1                    | .2  | -.3                   | .2  |
| Plan type (reference: Fee-for-service only)         |                                    |     |                                |     |                                         |     |                       |     |                       |     |
| Any behavioral health care carve-out plan           | 2.0                                | 1.9 | -.5                            | .9  | -.4                                     | .5  | -.7                   | .9  | -.4                   | 1.2 |
| Comprehensive managed care plan (no carve-out plan) | 1.7                                | 1.1 | -.9                            | .6  | -.02                                    | .3  | -.8                   | .6  | .03                   | .8  |
| Primary care case management (no carve-out plan)    | -1.0                               | 1.2 | .7                             | .5  | .4                                      | .4  | .3                    | .7  | -.3                   | .7  |
| More than one type of plan                          | -4.0***                            | 1.1 | .8                             | .5  | .8*                                     | .3  | 1.7**                 | .5  | .8                    | .7  |
| Eligibility type (reference: Blind/disabled)        |                                    |     |                                |     |                                         |     |                       |     |                       |     |
| Foster care                                         | 19.4***                            | .9  | -3.1***                        | .5  | -.9**                                   | .4  | -7.6***               | .6  | -7.8***               | .7  |
| Other eligibility type                              | -2.0**                             | .7  | .1                             | .3  | .03                                     | .3  | .4                    | .4  | 1.5**                 | .5  |
| Physical health comorbidity                         |                                    |     |                                |     |                                         |     |                       |     |                       |     |
| Asthma (reference: no)                              | .5                                 | .4  | -.7**                          | .3  | .5**                                    | .2  | -.5                   | .3  | .2                    | .3  |
| Any other chronic condition (reference: no)         | 1.8                                | 1.0 | -.3                            | .5  | .3                                      | .3  | .2                    | .7  | -2.0**                | .6  |

**Appendix Table 4 (Continued):** A New Specification of Multinomial Logistic Model of Racial/Ethnic Differences in Patterns of Medication Treatment among Medicaid-insured Children that Initiated ADHD Medication, Excluding Measures of County-Level Characteristics, Use of New Medication, and Medication Switching

|                                                                        | Continuous Medication <sup>‡</sup> |     | Early Termination <sup>‡</sup> |    | One Gap with Re-initiation <sup>‡</sup> |    | Two Gaps <sup>‡</sup> |     | ≥ 3 Gaps <sup>‡</sup> |     |
|------------------------------------------------------------------------|------------------------------------|-----|--------------------------------|----|-----------------------------------------|----|-----------------------|-----|-----------------------|-----|
|                                                                        | ME (%) ¶                           | SE  | ME (%) ¶                       | SE | ME (%) ¶                                | SE | ME (%) ¶              | SE  | ME (%) ¶              | SE  |
| <b>Mental health comorbidity</b>                                       |                                    |     |                                |    |                                         |    |                       |     |                       |     |
| Depressive disorder (reference: no)                                    | 1.9**                              | .7  | .6                             | .4 | .03                                     | .2 | -.2                   | .5  | -2.3***               | .5  |
| Conduct/oppositional defiant disorder (reference: no)                  | 2.7***                             | .4  | .2                             | .3 | -.1                                     | .2 | -.5                   | .3  | -2.3***               | .3  |
| Anxiety disorder (reference: no)                                       | 2.1**                              | .7  | .3                             | .4 | .5                                      | .3 | -.8                   | .4  | -2.0***               | .5  |
| Bipolar disorder (reference: no)                                       | 5.4***                             | .6  | -.3                            | .4 | .8***                                   | .2 | -1.1**                | .4  | -4.8***               | .4  |
| Schizophrenia/other psychotic disorder (reference: no)                 | 2.9                                | 1.6 | -.1                            | .9 | 1.0                                     | .5 | -1.6                  | 1.1 | -2.2                  | 1.2 |
| Other mental health disorder (reference: no)                           | 2.1***                             | .4  | .6**                           | .2 | -.1                                     | .1 | -.8**                 | .3  | -1.8***               | .3  |
| Received any psychotherapy service in treatment period (reference: no) | 7.5***                             | .5  | -3.3***                        | .3 | .001                                    | .2 | -1.3***               | .3  | -2.9***               | .3  |
| Intercept <sup>§</sup>                                                 | 49.3                               |     | 11.5                           |    | 4.4                                     |    | 15.9                  |     | 18.9                  |     |

Notes: ME: Marginal Effects; SE: Standard Errors.

<sup>‡</sup> The estimates reported in this table were from a single multinomial logistic regression model, and the number of observations for this model was the size of our analytic sample, N=102,669. We used the “margins” post-estimation command of multinomial logistic model in Stata software to obtain the marginal effects and model-adjusted percentage for each pattern of medication treatment. We also adjusted for state indicators in the multinomial logistic regression and clustered standard errors at the county-level.

¶ Marginal effects (in percentage) were estimated at the reference of race/ethnicity (i.e., Whites), and at the observed values of other covariates in the model.

§ Model-based predicted percentage of having a specific pattern of medication gaps/termination, which was estimated at the reference of race/ethnicity (i.e., Whites) and at the observed values of other covariates in the model.

\*  $p < .05$ , \*\*  $p < .01$ , \*\*\*  $p < .001$

**Appendix Table 5:** Patterns of Summer Medication Gaps Among Medicaid-Enrolled Youth (Age 6-12 Years) That Initiated ADHD Medication, By Patterns of Medication Gaps/Termination and By Race/Ethnicity<sup>§</sup>

|                                                                                                        | Total | White | Black <sup>±</sup> | Hispanic <sup>±</sup> | Other <sup>±</sup> | Unknown <sup>±</sup> |
|--------------------------------------------------------------------------------------------------------|-------|-------|--------------------|-----------------------|--------------------|----------------------|
| <i>Had any summer medication gaps (%)</i>                                                              |       |       |                    |                       |                    |                      |
| Total that did not have continuous medication [N=62,540]                                               | 67.2  | 66.9  | 67.2               | 67.9                  | 61.9*              | 67.0                 |
| Early Termination [N=13,527]                                                                           | 34.1  | 34.5  | 33.8               | 34.0                  | 27.7               | 34.5                 |
| One Gap with Re-initiation [N=4,384]                                                                   | 48.0  | 50.4  | 45.1**             | 47.8                  | 52.4               | 43.5*                |
| Two Gaps [N=19,391]                                                                                    | 67.9  | 70.0  | 65.3***            | 69.8                  | 59.1**             | 67.4                 |
| ≥ 3 Gaps [N=25,238]                                                                                    | 87.6  | 88.1  | 86.8**             | 88.8                  | 91.3               | 87.4                 |
| <i>Among those with any summer gaps, length of medication gaps in summer (month)</i>                   |       |       |                    |                       |                    |                      |
| Total that had any summer gaps [N=41,996]                                                              | 2.8   | 2.9   | 2.8**              | 2.8**                 | 2.8                | 2.8**                |
| Early Termination [N=4,611]                                                                            | 2.9   | 2.9   | 2.9                | 2.9                   | 3.1                | 3.0                  |
| One Gap with Re-initiation [N=2,103]                                                                   | 3.0   | 3.0   | 3.0                | 2.9                   | 2.8                | 2.9                  |
| Two Gaps [N=13,167]                                                                                    | 2.8   | 2.8   | 2.8                | 2.8**                 | 2.8                | 2.7*                 |
| ≥ 3 Gaps [N=22,115]                                                                                    | 2.8   | 2.8   | 2.8                | 2.8                   | 2.8                | 2.8*                 |
| <i>Among those with any summer gaps, had summer medication gaps extended to post-summer months (%)</i> |       |       |                    |                       |                    |                      |
| Total that had any summer gaps [N=41,996]                                                              | 55.2  | 52.6  | 56.3***            | 58.0***               | 63.3***            | 56.2***              |
| Early Termination [N=4,611]                                                                            | 97.3  | 95.7  | 98.7***            | 98.5***               | 97.4               | 97.6                 |
| One Gap with Re-initiation [N=2,103]                                                                   | 77.5  | 73.9  | 80.7**             | 80.8**                | 95.5***            | 82.2*                |
| Two Gaps [N=13,167]                                                                                    | 61.7  | 55.9  | 66.7***            | 63.6***               | 70.2**             | 63.9***              |
| ≥ 3 Gaps [N=22,115]                                                                                    | 40.4  | 37.2  | 41.7***            | 43.6***               | 47.8**             | 40.9*                |

Notes: <sup>§</sup> Because our MAX data provide no information about whether and when children were on a “drug holiday,” we used medication gaps that occurred in the summer months (i.e., May, June, July, and August) as a proxy measure of a “drug holiday.” More specifically, a summer medication gap was defined as any medication gap that started in the summer months and ended within the summer months or extended to the post-summer months.

<sup>±</sup> Statistical tests were conducted using adjusted Wald tests to compare youth in each racial/ethnic minority group to White youth.

\* p<.05, \*\* p<.01, \*\*\* p<.001
